# Supplementary material
Source: MDPI journal article supplement (https://www.mdpi.com/2073-4441/14/6/839)
Supplement: s1 [file s1]

Supplementary Materials

**Table S1** Kinetics and isotherm constants for Cu (II) removal by the SC-HA/C composite

| <i>Pseudo-second-order equation</i>     |                    |                  |               |        |
|-----------------------------------------|--------------------|------------------|---------------|--------|
| Initial Cu (II)<br>concentration (mg/L) | $k_2$ (g/(mg·min)) | $h$ (g/(mg·min)) | $q_e$ (mg/g)  | $R^2$  |
| 10                                      | 2.1613             | 2.3491           | 1.04          | 1.0000 |
| 20                                      | 1.7376             | 7.0771           | 2.02          | 1.0000 |
| 50                                      | 0.1115             | 2.8843           | 5.09          | 1.0000 |
| <i>Langmuir isotherm</i>                |                    |                  |               |        |
| Temperature (°C)                        | $q_m$ (mg/g)       | $K_L$ (L/mg)     | $R_L$         | $R^2$  |
| 25                                      | 9.27               | 0.6134           | 0.0039~0.2927 | 0.9720 |
| 35                                      | 10.60              | 0.3944           | 0.0060~0.3916 | 0.9713 |
| 45                                      | 19.23              | 0.3738           | 0.0063~0.4044 | 0.9956 |

**Table S2** Comparison of the copper removal capacities of SC-HA/C with some other materials

| Material                                    | pH    | Concentr. (mg/L) | Surface area<br>(m <sup>2</sup> /g) | Particle size (mm) | T (°C) | Capacity<br>(mg/g) | Ref.       |
|---------------------------------------------|-------|------------------|-------------------------------------|--------------------|--------|--------------------|------------|
| SC-HA/C                                     | 5     | 10~100           | 8.52                                | >3                 | 25     | 1.10~8.77          | This study |
| SC-HA/C                                     | 5     | 10~100           | 28.44                               | <0.149             | 25     | 1.10~10.70         | This study |
| SC-HA/C                                     | 5     | 5~350            | 28.44                               | <0.149             | 25     | 0.47~11.50         | This study |
| SC-HA/C                                     | 5     | 5~350            | 28.44                               | <0.149             | 35     | 0.49~14.65         | This study |
| SC-HA/C                                     | 5     | 5~350            | 28.44                               | <0.149             | 45     | 0.50~19.81         | This study |
| SC-Charcoal                                 | 5     | 10~100           | -                                   | <0.149             | 25     | 0.19~0.27          | This study |
| Activated carbon                            | 5     | 10~100           | -                                   | <0.149             | 25     | 1.10~3.81          | This study |
| HA powder                                   | 5     | 10~100           | -                                   | <0.149             | 25     | 1.09~10.95         | This study |
| SCB                                         | -     | 63.546~317.73    | -                                   | 60~80mesh          | room   | 4.13               | [39]       |
| SCB                                         | 6     | 63.55            | -                                   | 0.75               | room   | 5.46               | [41]       |
| SCB                                         | 5     | 1000             | -                                   | <100mesh           | room   | 6.87               | [5]        |
| SCB                                         | 6.48  | 10               | -                                   | <0.15              | 20     | 9.48               | [6]        |
| SCB                                         | 5     | 31.77            | -                                   | <0.1               | room   | 6.35               | [12]       |
| SCB                                         | 6     | 10~100           | 9.08                                | 0.15               | 27     | 9.73               | [40]       |
| SCB                                         | 6.48  | 3~300            | -                                   | <0.15              | 20     | 10.64              | [13]       |
| SCB                                         | 5     | 5~70             | -                                   | <100mesh           | room   | 7.63               | [3]        |
| SCB AC                                      | 6     | 8~92             | 1502                                | -                  | room   | 13.24              | [15]       |
| SCB modified with<br>Tetraethylenepentamine | 5     | 5~70             | -                                   | 100mesh            | room   | 13.34              | [3]        |
| SCB modified with NaOH                      | 5     | 1000             | -                                   | <100mesh           | room   | 11.87              | [5]        |
| Loofa sponge                                | 6.00  | 10~500           | -                                   | -                  | 20 ±2  | 5.12               | [14]       |
| Sawdust                                     | 4±0.2 | 5~50             | -                                   | 0.45~0.60          | 25     | 6.59               | [4]        |
| Banana peel                                 | 6.48  | 10               | -                                   | <0.15              | 20     | 8.24               | [6]        |
| Watermelon rind                             | 6.48  | 10               | -                                   | <0.15              | 20     | 5.73               | [6]        |
| Synthetic HA (Merck)                        | 5     | 63.55            | 66                                  | <0.025             | 25     | 17.79              | [19]       |
| Synthetic HA (Bio-Rad)                      | 5     | 63.55            | 77                                  | 0.025~0.25         | 25     | 7.63               | [19]       |
| Synthetic HA (Alfa Aesar)                   | 5.27  | 10~500           | 50                                  | -                  | 25 ±2  | 1.02~48.55         | [7]        |
| Nano-HA                                     | 6     | 10               | -                                   | 200nm              | 30     | 4.7                | [1]        |
| Nano-HA/chitin composite                    | 6     | 10               | -                                   | 200nm              | 30     | 5.4                | [1]        |

|                            |         |        |      |         |      |            |      |
|----------------------------|---------|--------|------|---------|------|------------|------|
| Nano-HA/chitosan composite | 6       | 10     | -    | 200nm   | 30   | 6.2        | [1]  |
| Carbon nanotube sheets     | 7       | 100    | -    | 10~40nm | 25   | 10.08      | [21] |
| Phosphate rock             | 5.5±0.2 | 38     | -    | 0.425   | 25±2 | 7.24       | [16] |
| Phosphate rock             | -       | 10-100 | -    | 105~150 | 25   | 1.998~16.8 | [17] |
| Phosphate rock             | 5       | 500    | 13.5 | -       | 20   | 9.76       | [18] |
| Activated phosphate rock   | 5       | 500    | 22.5 | -       | 20   | 13.28      | [18] |

Note: SCB - Sugarcane bagasse; AC- Activated carbon; HA - Hydroxylapatite.
